# Supplementary material
Source: PubMed Central journal article supplement (PMC3992007)
Supplement: Supp_Fig1.pdf [file Supp_Fig1.pdf]

## Supplementary Data

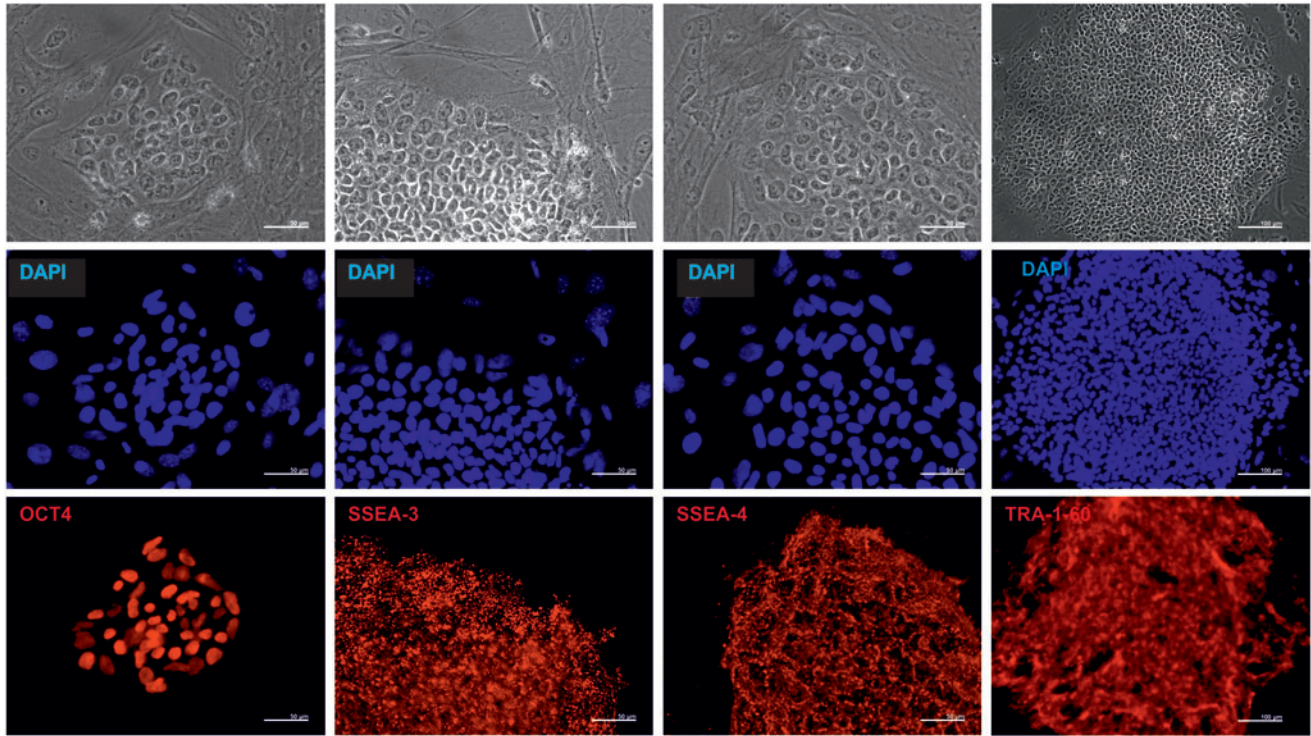

hCBiPSC2, Passage 7

**SUPPLEMENTARY FIG. S1.** Expression of pluripotency markers in the paternal line hCBiPSC2. Light microscopy (upper row) and fluorescence microscopy of typical colonies grown of feeder cells. Homogeneous staining for pluripotency associated markers OCT4, SSEA-3, SSEA-4, and TRA-1-60 (in red; DAPI stained nuclei in blue) is depicted. Scale bars: 50  $\mu\text{m}$  for OCT4, SSEA-3, SSEA4; 100  $\mu\text{m}$  for TRA-1-60, respectively.
