# Supplementary material
Source: PubMed Central journal article supplement (PMC3992007)
Supplement: Supp_Table1.pdf [file Supp_Table1.pdf]

SUPPLEMENTARY TABLE S1. SEQUENCES OF OLIGONUCLEOTIDES USED FOR ANALYSIS  
OF THE FULL INTEGRITY OF  $\alpha$ MHCNEOPGKHYGRO<sup>a</sup>

| <i>Primer name</i>      | <i>Position</i> | <i>Annealing temperature (°C)</i> | <i>Product size (bp)</i> | <i>Sequence (5' → 3')</i>  |
|-------------------------|-----------------|-----------------------------------|--------------------------|----------------------------|
| $\alpha$ MHC_neo sense  | 5157            | 55                                | 419                      | cgg cac tct tag caa acc tc |
| $\alpha$ MHC-neo ras I  | 5576            |                                   |                          | ctc gct ctg cag ttc att ca |
| $\alpha$ MHC_neo sense  | 5157            | 55                                | 717                      | cgg cac tct tag caa acc tc |
| $\alpha$ MHC-neo ras II | 5874            |                                   |                          | gat gct ctt cgt cca gat ca |
| PGK-hygro sense         | 6669            | 55                                | 665                      | tag cag ctt tgc tcc ttc g  |
| PGK-hygro ras I         | 7334            |                                   |                          | act gac ggt gtc gtc cat c  |
| PGK-hygro sense         | 6669            | 55                                | 679                      | tag cag ctt tgc tcc ttc g  |
| PGK-hygro ras II        | 7348            |                                   |                          | tcc atc aca gtt tgc cag tg |

<sup>a</sup>PCR program used together with primers listed in Supplementary Table S1: 94°C for 1 min; 35 cycles of 94°C for 1 min, 55°C for 1 min, and 72°C for 90 sec; 72°C for 10 min; and 4°C (endlessly).
