# Supplementary material
Source: PubMed Central journal article supplement (PMC3992007)
Supplement: Supp_Table2.pdf [file Supp_Table2.pdf]

SUPPLEMENTARY TABLE S2. SEQUENCES OF OLIGONUCLEOTIDES USED FOR QUANTITATIVE REAL-TIME RT-PCR

| <i>Primer name</i> | <i>Target</i> | <i>Position</i> | <i>Annealing temperature (°C)</i> | <i>Product size (bp)</i> | <i>Sequence (5' → 3')</i> |
|--------------------|---------------|-----------------|-----------------------------------|--------------------------|---------------------------|
| β-actin RT sense   | GI 168480144  | 1028            | 60                                | 176                      | ATTGCCGACAGGATGCAGAA      |
| β-actin RT ras     |               | 1165            |                                   |                          | GGGCCGGACTCGTCATACTC      |
| rNIS sense         | GI U60282.1   | 1193            | 60                                | 168                      | ATGGCAGCTGTGACTGTGGA      |
| rNIS ras           |               | 1361            |                                   |                          | TGAAGGAACCCTGGAGGACA      |
