# Supplementary material
Source: PubMed Central journal article supplement (PMC3992007)

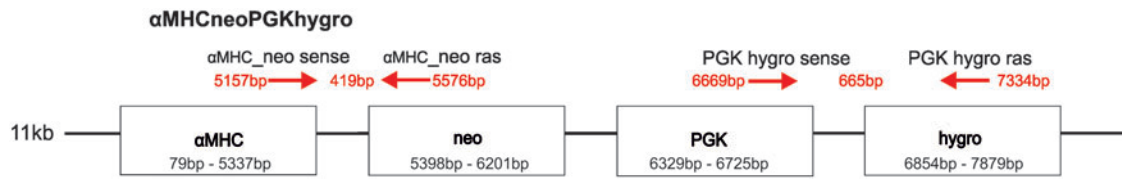

**SUPPLEMENTARY FIG. S2.** Binding sites of Primers used for clone characterization.

Supplement: Supp_Fig2.pdf [file Supp_Fig2.pdf]
